# Supplementary material for: Time-to-Seizure Modeling of Lacosamide Used in Monotherapy in Patients with Newly Diagnosed Epilepsy
Source: PubMed Central journal article supplement — Clin Pharmacokinet. 2017 Mar 13;56(11):1403–13. doi: 10.1007/s40262-017-0530-8 (PMC5648747; doi:10.1007/s40262-017-0530-8), 2017-03-13
Supplement: 40262_2017_530_MOESM1_ESM.pdf [file 40262_2017_530_MOESM1_ESM.pdf]

Title: Time-to-seizure modeling of lacosamide used in monotherapy in patients with newly diagnosed epilepsy.

Journal: Clinical Pharmacokinetics

Authors: Andreas Lindauer, Christian Laveille, Armel Stockis

Corresponding author: Andreas Lindauer

Affiliation: SGS Exprimo, Mechelen, Belgium

Email: Andreas.lindauer@sgs.com

## Online resource 1: Supplementary tables

Table 1: Summary statistic of patient demographics

|                                                                            | Drug                |                     | Total               |
|----------------------------------------------------------------------------|---------------------|---------------------|---------------------|
|                                                                            | LCM                 | CBZ                 |                     |
| <b>N (%)</b>                                                               | 443 (50.2)          | 440 (49.8)          | 883 (100.0)         |
| <b>Age (yrs)</b>                                                           |                     |                     |                     |
| Mean (CV%)                                                                 | 42.0 (42.6)         | 41.8 (41.3)         | 41.9 (41.9)         |
| Median (range)                                                             | 40.0 (16.0 - 87.0)  | 41.0 (16.0 - 85.0)  | 40.0 (16.0 - 87.0)  |
| IQR                                                                        | 25.5 - 55.0         | 26.0 - 55.0         | 26.0 - 55.0         |
| <b>Weight (kg)</b>                                                         |                     |                     |                     |
| Mean (CV%)                                                                 | 72.6 (22.2)         | 73.2 (21.6)         | 72.9 (21.9)         |
| Median (range)                                                             | 71.0 (35.6 - 130.0) | 71.0 (37.2 - 136.1) | 71.0 (35.6 - 136.1) |
| IQR                                                                        | 61.0 - 83.0         | 61.6 - 82.2         | 61.0 - 83.0         |
| <b>Time since diagnosis of epilepsy (yrs)</b>                              |                     |                     |                     |
| Mean (CV%)                                                                 | 0.3 (715.6)         | 0.3 (539.5)         | 0.3 (630.9)         |
| Median (range)                                                             | 0.1 (0.0 - 37.9)    | 0.1 (0.0 - 21.9)    | 0.1 (0.0 - 37.9)    |
| IQR                                                                        | 0.0 - 0.1           | 0.0 - 0.1           | 0.0 - 0.1           |
| <b>Number of seizures in the past 3 months</b>                             |                     |                     |                     |
| Mean (CV%)                                                                 | 12.4 (319.8)        | 10.2 (279.1)        | 11.3 (305.3)        |
| Median (range)                                                             | 3.0 (1.0 - 450.0)   | 2.0 (0.0 - 300.0)   | 2.0 (0.0 - 450.0)   |
| IQR                                                                        | 1.0 - 6.0           | 2.0 - 5.0           | 1.0 - 6.0           |
| <b>Number of seizures in the past 3 months (categorical) (N,%)</b>         |                     |                     |                     |
| <=1                                                                        | 122 (27.5)          | 105 (23.9)          | 227 (25.7)          |
| 2-6                                                                        | 216 (48.8)          | 238 (54.1)          | 454 (51.4)          |
| 7-50                                                                       | 80 (18.1)           | 80 (18.2)           | 160 (18.1)          |
| >50                                                                        | 25 (5.6)            | 17 (3.9)            | 42 (4.8)            |
| <b>Time since diagnosis of epilepsy (categorical) (N,%)</b>                |                     |                     |                     |
| <=1yr                                                                      | 434 (98.0)          | 432 (98.2)          | 866 (98.1)          |
| >1yr                                                                       | 9 (2.0)             | 8 (1.8)             | 17 (1.9)            |
| <b>Number of antiepileptic drugs taken before entering the study (N,%)</b> |                     |                     |                     |
| none                                                                       | 398 (89.8)          | 403 (91.6)          | 801 (90.7)          |
| >=1                                                                        | 45 (10.2)           | 37 (8.4)            | 82 (9.3)            |
| <b>Sex (N,%)</b>                                                           |                     |                     |                     |
| Female                                                                     | 200 (45.1)          | 209 (47.5)          | 409 (46.3)          |
| Male                                                                       | 243 (54.9)          | 231 (52.5)          | 474 (53.7)          |
| <b>Race (N,%)</b>                                                          |                     |                     |                     |
| White                                                                      | 378 (85.3)          | 365 (83.0)          | 743 (84.1)          |
| Black                                                                      | 5 (1.1)             | 2 (0.5)             | 7 (0.8)             |
| Asian                                                                      | 49 (11.1)           | 57 (13.0)           | 106 (12.0)          |
| Other                                                                      | 7 (1.6)             | 13 (3.0)            | 20 (2.3)            |

|                                                   | Drug       |            | Total      |
|---------------------------------------------------|------------|------------|------------|
|                                                   | LCM        | CBZ        |            |
| <i>Missing</i>                                    | 4 (0.9)    | 3 (0.7)    | 7 (0.8)    |
| <b>Geographical region of study centers (N,%)</b> |            |            |            |
| Western Europe                                    | 159 (35.9) | 126 (28.6) | 285 (32.3) |
| Eastern Europe                                    | 177 (40.0) | 200 (45.5) | 377 (42.7) |
| Asia                                              | 47 (10.6)  | 55 (12.5)  | 102 (11.6) |
| Australia                                         | 22 (5.0)   | 10 (2.3)   | 32 (3.6)   |
| North America                                     | 35 (7.9)   | 43 (9.8)   | 78 (8.8)   |
| South America                                     | 3 (0.7)    | 6 (1.4)    | 9 (1.0)    |

Percentages shown in parenthesis; IQR: Interquartile range; CV: Coefficient of variation

Table 2: Summary of seizure events

|                                                               | Drug                |                     | Total               |
|---------------------------------------------------------------|---------------------|---------------------|---------------------|
|                                                               | LCM                 | CBZ                 |                     |
| <b>N (%)</b>                                                  | 443 (50.2)          | 440 (49.8)          | 883 (100.0)         |
| <b>Time in trial until end of treatment or dropout (days)</b> |                     |                     |                     |
| Mean (CV%)                                                    | 330.2 (43.7)        | 319.6 (49.2)        | 324.9 (46.4)        |
| Median (range)                                                | 384.0 (0.5 - 706.0) | 384.0 (0.5 - 671.0) | 384.0 (0.5 - 706.0) |
| IQR                                                           | 252.0 - 390.0       | 211.5 - 389.0       | 223.0 - 390.0       |
| <b>Number of seizure-days during trial</b>                    |                     |                     |                     |
| Mean (CV%)                                                    | 4.4 (276.2)         | 4.1 (345.3)         | 4.3 (309.8)         |
| Median (range)                                                | 0.0 (0.0 - 140.0)   | 0.0 (0.0 - 161.0)   | 0.0 (0.0 - 161.0)   |
| IQR                                                           | 0.0 - 3.0           | 0.0 - 2.0           | 0.0 - 2.0           |
| <b>Number of seizure-days (categorical) (N,%)</b>             |                     |                     |                     |
| 0                                                             | 232 (52.4)          | 255 (58.0)          | 487 (55.2)          |
| 1                                                             | 67 (15.1)           | 66 (15.0)           | 133 (15.1)          |
| 2                                                             | 23 (5.2)            | 31 (7.0)            | 54 (6.1)            |
| 3                                                             | 21 (4.7)            | 16 (3.6)            | 37 (4.2)            |
| 4                                                             | 13 (2.9)            | 7 (1.6)             | 20 (2.3)            |
| 5                                                             | 15 (3.4)            | 8 (1.8)             | 23 (2.6)            |
| 6                                                             | 9 (2.0)             | 4 (0.9)             | 13 (1.5)            |
| 7                                                             | 1 (0.2)             | 4 (0.9)             | 5 (0.6)             |
| 8                                                             | 3 (0.7)             | 6 (1.4)             | 9 (1.0)             |
| 9                                                             | 5 (1.1)             | 3 (0.7)             | 8 (0.9)             |
| >=10                                                          | 54 (12.2)           | 40 (9.1)            | 94 (10.6)           |
| <b>Last dose step (N,%)</b>                                   |                     |                     |                     |
| 1                                                             | 313 (70.7)          | 322 (73.2)          | 635 (71.9)          |
| 2                                                             | 86 (19.4)           | 86 (19.5)           | 172 (19.5)          |
| 3                                                             | 44 (9.9)            | 32 (7.3)            | 76 (8.6)            |

Percentages shown in parenthesis; IQR: Interquartile range; CV: Coefficient of variation

Table 3: Parameter estimates for dropout model on N01061 data

| Parameter                        | Description                          | Estimate | 90% CI <sup>a</sup> |
|----------------------------------|--------------------------------------|----------|---------------------|
| $\lambda_1$ (1/day) <sup>b</sup> | Hazard from t=0 to breakpoint (BP) 1 | 0.00104  | 0.000641 - 0.00169  |
| $\lambda_2$ (1/day) <sup>b</sup> | Hazard from BP1 to BP2               | 0.00611  | 0.00431 - 0.00867   |
| $\lambda_3$ (1/day) <sup>b</sup> | Hazard from BP2 to BP3               | 0.00116  | 0.000879 - 0.00152  |
| $\lambda_4$ (1/day) <sup>b</sup> | Hazard from BP3 to BP4               | 0.000521 | 0.000401 - 0.000678 |
| $\lambda_5$ (1/day) <sup>b</sup> | Hazard from BP4 to end               | 0.00319  | 0.00191 - 0.00531   |
| BP1 (day)                        | Breakpoint 1                         | 20       | 19.1 - 20.8         |
| BP2 (day)                        | $\Delta$ (BP2-BP1)                   | 9.19     | 7.66 - 10.7         |
| BP3 (day)                        | $\Delta$ (BP3-BP2)                   | 90.7     | 84.6 - 96.7         |
| BP4 (day)                        | $\Delta$ (BP4-BP3)                   | 336      | 314 - 357           |
| Coeff_SEX                        | Effect of sex=female on hazard       | 0.562    | 0.319 - 0.806       |
| HR_SEX <sup>b</sup>              | Hazard ratio female vs. male         | 1.75     | 1.38 - 2.24         |
| Coeff_TYPE                       | Effect of LEV on hazard              | -0.343   | -0.586 to -0.0992   |
| HR_TYPE <sup>b</sup>             | Hazard ratio LEV vs. CBZ             | 0.71     | 0.557 - 0.906       |

HR: Hazard ratio

<sup>a</sup> Asymptotic confidence interval derived from NONMEM standard errors

<sup>b</sup> Parameter back-transformed to normal scale as:  $\exp(x)$

Table 4: Parameter estimates of the seizure model developed on N01061 data

| Parameter                          | Description                                       | Estimate  | 90% CI <sup>a</sup>  |
|------------------------------------|---------------------------------------------------|-----------|----------------------|
| $\lambda_1$ (1/day) <sup>b</sup>   | $\lambda$ for the time to 1st event               | 0.000641  | 0.000395 - 0.000998  |
| p1                                 | Weibull shape parameter 1st event                 | 0.558     | 0.518 - 0.613        |
| $\lambda_2$ (1/day) <sup>b</sup>   | $\lambda$ for the 2nd+ event                      | 0.00786   | 0.00496 - 0.0124     |
| p2                                 | Weibull shape parameter 2nd+ event                | 0.968     | 0.859 - 1.17         |
| NSP3M( $\leq 1$ ) $\sim \lambda_1$ | Effect of NSP3M $\leq 1$ on $\ln(\lambda_1)$      | -1.41     | -2.14 to -0.868      |
| NSP3M(7-50) $\sim \lambda_1$       | Effect of NSP3M 7-50 on $\ln(\lambda_1)$          | 2.11      | 1.59 - 2.62          |
| NSP3M(>50) $\sim \lambda_1$        | Effect of NSP3M >50 on $\ln(\lambda_1)$           | 2.42      | 1.35 - 3.61          |
| NSP3M( $\leq 1$ ) $\sim \lambda_2$ | Effect of NSP3M $\leq 1$ on $\ln(\lambda_2)$      | -0.631    | -1.66 - 0.274        |
| NSP3M(7-50) $\sim \lambda_2$       | Effect of NSP3M 7-50 on $\ln(\lambda_2)$          | 1.39      | 0.806 - 1.99         |
| NSP3M(>50) $\sim \lambda_2$        | Effect of NSP3M >50 on $\ln(\lambda_2)$           | 3.11      | 2.15 - 3.94          |
| AUC_LEV $\sim \lambda_1$           | Slope of AUC- $\ln(\lambda_1)$ for LEV 1st event  | -0.00446  | -0.00705 to -0.00198 |
| AUC_CBZ $\sim \lambda_1$           | Slope of AUC- $\ln(\lambda_1)$ for CBZ 1st event  | -0.0174   | -0.0259 to -0.00867  |
| AUC_LEV $\sim \lambda_2$           | Slope of AUC- $\ln(\lambda_1)$ for LEV 2nd+ event | -0.000715 | -0.00154 to -0.00019 |
| AUC_CBZ $\sim \lambda_2$           | Slope of AUC- $\ln(\lambda_1)$ for CBZ 2nd+ event | -0.00615  | -0.0154 to -0.00153  |
| TYPE_LEV $\sim \lambda_1$          | Effect of LEV on 1st event                        | 0.815     | 0.332 - 1.32         |
| IIV $\ln(\lambda_2)$ (SD)          | Inter-individual variability $\ln(\lambda_2)$     | 2.19      | 1.95 - 2.39          |

SD: Standard deviation

<sup>a</sup> 5th-95th percentiles of 500 bootstrap replicates

<sup>b</sup> Parameter back-transformed to normal scale as:  $\exp(x)$

AUC was centered around the typical value in the first dose level (LEV: 249 h.mg/L, CBZ: 132 h.mg/L)
