# Supplementary material for: Time-to-Seizure Modeling of Lacosamide Used in Monotherapy in Patients with Newly Diagnosed Epilepsy
Source: PubMed Central journal article supplement — Clin Pharmacokinet. 2017 Mar 13;56(11):1403–13. doi: 10.1007/s40262-017-0530-8 (PMC5648747; doi:10.1007/s40262-017-0530-8), 2017-03-13
Supplement: 40262_2017_530_MOESM4_ESM.pdf [file 40262_2017_530_MOESM4_ESM.pdf]

Title: Time-to-seizure modeling of lacosamide used in monotherapy in patients with newly diagnosed epilepsy.

Journal: Clinical Pharmacokinetics

Authors: Andreas Lindauer, Christian Laveille, Arnel Stockis

Corresponding author: Andreas Lindauer

Affiliation: SGS Exprimo, Mechelen, Belgium

Email: Andreas.lindauer@sgs.com

## Online resource 4: NONMEM code

```
$SIZES NO=10000 LIM6=20000
$PROBLEM RTTE seizure and dropout model for lacosamide and carbamazepine
$INPUT ID TYPE TIME DV CL FLX AGE SEX WT NSP3M

$DATA SimulationData.csv
IGNORE=@

$SUBR ADVAN=13 TOL=9
$MODEL COMP=(SEIZURE) COMP=(DROP)

$PK
"FIRST
" USE PRDATA, ONLY: MXSTP01
" MXSTP01=2147483647

; ; Parameters of the RTTE seizure model-----

; 1st event
TVLAM1 = (THETA(1))
TVSHP1 = THETA(2)

; 2nd + events
TVLAM = (THETA(3))
TVSHP = THETA(4)
; Drug effect on 1st Event
SLLCM_1 = THETA(11)
SLLEV_1 = 0
SLCBZ_1 = THETA(12)

; Drug effect on 2nd+ Events
SLLCM = THETA(13)
SLLEV = 0
SLCBZ = THETA(14)

DEL=1E-12
; ;-----
; ; Parameters of dropout model -----
; ; VARSEX-DEFINITION START
IF(SEX.EQ.1) VARSEX = 0 ; Most common - male
IF(SEX.EQ.0) VARSEX = ( 0 + 0.238)
; ; VARSEX-DEFINITION END

; ; VARTYPE-DEFINITION START
VARTYPE = 0 ; CBZ
IF(TYPE.EQ.3) VARTYPE = ( 0 - 0.138) ; LCM
; ; VARTYPE-DEFINITION END

; ; VAR-RELATION START
VARDR=VARSEX + VARTYPE
; ; VAR-RELATION END

TM1 = 20
TM2 = TM1 + 9.76
```

```
TM3 = TM2 + 105
TM4 = TM3 + 340
```

```
GAM = 50
```

```
LAM1 = EXP(-6.19)
LAM2 = EXP(-5.63)
LAM3 = EXP(-6.96)
LAM4 = EXP(-7.4)
LAM5 = EXP(-6.11)
```

```
;;-----
```

```
;; Initialization of counters etc.-----
```

```
IF(NEWIND.NE.2) THEN ; re-initialize for every new ID
```

```
TP=0
TPEVAL=0
CDL = 1 ; current dose level (DL)
TIMEDL = 0 ; Time at start of DL
ESC = 0 ; Escalation indicator
SCOUNTDL= 0 ; seizure counter in dose level
SCOUNT = 0 ; total seizure counter
DRP=0 ; dropout indicator
M6FREE=0 ; seizure free for 6 months counter
EVSEIZ= 0 ; counts if seizure in evaluation period
RTTE=0
```

```
ENDIF
```

```
;;-----
```

```
IF(ESC.EQ.1.AND.CDL.LT.3) THEN
```

```
CDL=CDL+1 ; Count DL 1 up upon event only during evaluation period
TIMEDL = TIME
TPEVAL = 0 ; start of evaluation period
SCOUNTDL= 0
EVSEIZ=0
```

```
ENDIF
```

```
TIMEDL1 = TIME - TIMEDL
```

```
;; Simulation of AUC
```

```
; takes the individual PK parameters and body weight from the input dataset
```

```
;;; For CBZ ;;;;;;;;;;;;;;;;;;;;;;;;;;;;;;;;;;;;;;;;;;;;;;;;;;
```

```
IF(TYPE.EQ.2) THEN
```

```
IF(CDL.EQ.1) THEN ; CBZ 1st dose step
```

```
CDOSE = 400
```

```
IF(TIMEDL1.LT.7) CDOSE= 200 ; 1 weeks up-titration
```

```
ENDIF
```

```
IF(CDL.EQ.2) THEN ; CBZ 2nd dose step
```

```
CDOSE = 800
```

```
IF(TIMEDL1.LT.7) CDOSE= 600 ; 1 weeks up-titration
```

```
ENDIF
```

```
IF(CDL.EQ.3) THEN ; CBZ 3rd dose step
```

```
CDOSE = 1200
```

```
IF(TIMEDL1.LT.7) CDOSE= 1000 ; 1 weeks up-titration
```

```
ENDIF
```

```
CL2=5.35*(((CDOSE/WT)/15)**0.591)*((WT/70)**0.564)
```

```
CAUC=CDOSE*F1X/CL2
```

```
ENDIF
```

```
;;; FOR LCM ;;;;;;;;;;;;;;;;;;;;;;;;;;;;;;;;;;;;;;;;;;;;;;;;;
```

```
IF(TYPE.EQ.3) THEN
```

```
IF(CDL.EQ.1) THEN ; LCM 1st dose step
```

```
CDOSE = 200
```

```
IF(TIMEDL1.LT.7) CDOSE= 100 ; 2 weeks up-titration
```

```
ENDIF
```

```
IF(CDL.EQ.2) THEN ; LCM 2nd dose step
```

```
CDOSE = 400
```

```
IF(TIMEDL1.LT.7) CDOSE= 300 ; 2 weeks up-titration
```

```
ENDIF
```

```
IF(CDL.EQ.3) THEN ; LCM 3rd dose step
```

```

CDOSE = 600
IF(TIMEDL1.LT.7) CDOSE= 500 ; 2 weeks up-titration
ENDIF
CAUC=CDOSE*F1X/CL
ENDIF

;;; AUC-EFFECT
IF(TYPE.EQ.2) THEN
  VARAUC=(0 + SLCBZ * (CAUC-132)) ; if CBZ
  VARAUC_1= (0 + SLCBZ_1 * (CAUC-132))
ENDIF
IF(TYPE.EQ.3) THEN
  VARAUC=(0 + SLLCM * (CAUC-104)) ; if LCM
  VARAUC_1= (0 + SLLCM_1 * (CAUC-104))
ENDIF
;;; AUC-DEFINITION END

;;; NSP3M-EFFECT on 1st seizure
IF(NSP3M.LE.1) VARNSP3M1 = 0 + THETA(5) ; 1 seizures
IF(NSP3M.GE.2.AND.NSP3M.LE.6) VARNSP3M1 = ( 0 ) ; 2-6 seizures
IF(NSP3M.GE.7.AND.NSP3M.LE.50) VARNSP3M1 = ( 0 + THETA(6)) ; 7-50 seizures
IF(NSP3M.GT.50) VARNSP3M1 = ( 0 + THETA(7)) ; More than 50 seizures
;;; VARNSP3M-DEFINITION END

;;; NSP3M-EFFECT on 2nd+ seizures
IF(NSP3M.LE.1) VARNSP3M = 0 + THETA(8) ; 1 seizures
IF(NSP3M.GE.2.AND.NSP3M.LE.6) VARNSP3M = ( 0 ) ; 2-6 seizures
IF(NSP3M.GE.7.AND.NSP3M.LE.50) VARNSP3M = ( 0 + THETA(9)) ; 7-50 seizures
IF(NSP3M.GT.50) VARNSP3M = ( 0 + THETA(10)) ; More than 50 seizures
;;; VARNSP3M-DEFINITION END

;;; AGE-EFFECT
SLAGE_1 = 0
IF(TYPE.EQ.3) THEN
  SLAGE_1 = THETA(17) ; age effect only for LCM
ENDIF

;;; AGE-LAM1 relationship
VARAGE_1= (0 + SLAGE_1 * (AGE-41))
;;; AGE EFFECT END

;;; Seizure model -----
IF(SCOUNT.LT.1) THEN ; For 1st event
  LAM = EXP(TVLAM1+ VARNSP3M1 + VARAUC_1 + VARLEV1 + VARAGE_1) ; scale factor
  SHP = TVSHP1
ELSE ; 2nd+ events
  LAM = EXP(TVLAM + ETA(1) + VARNSP3M + VARAUC + VARLEV) ; scale factor
  SHP = TVSHP
ENDIF

$DES
DADT(1)=LAM*SHP*(LAM*(T-TP)+DEL)**(SHP-1) ; Hazard of seizure

;;; Dropout model equations -----
FLG5 = (T+DEL)**GAM/(TM4**GAM+(T+DEL)**GAM) ; T > TM 4
FLG4 = ((T+DEL)**GAM/(TM3**GAM+(T+DEL)**GAM) -
(T+DEL)**GAM/(TM4**GAM+(T+DEL)**GAM) ) ; T between TM 3 and 4
FLG3 = ((T+DEL)**GAM/(TM2**GAM+(T+DEL)**GAM) -
(T+DEL)**GAM/(TM3**GAM+(T+DEL)**GAM) ) ; T between TM 2 and 3
FLG2 = ((T+DEL)**GAM/(TM1**GAM+(T+DEL)**GAM) -
(T+DEL)**GAM/(TM2**GAM+(T+DEL)**GAM) ) ; T between TM 1 and 2
FLG1 = (1-(T+DEL)**GAM/(TM1**GAM+(T+DEL)**GAM) ) ; T<TM 1

HAZD = ( LAM1*FLG1 + LAM2*FLG2 + LAM3*FLG3 + LAM4*FLG4 + LAM5*FLG5 ) * EXP(VARDR)

DADT(2)=HAZD ; Hazard of dropout
;;; -----

```

```

$ERROR
XCHZ = A(1) ; Cumulative hazard from time=0

;-----Seizure probability and Hazard -----
IF(NEWIND.NE.2) OLDCHZ=0 ;Initialization of OLDCHZ for each ID
CHZ = XCHZ-OLDCHZ ;Cumulative hazard since latest event
SUR = EXP(-CHZ) ;Seizure probability

HAZ=LAM*SHP*(LAM*(TIME-TP)+DEL)**(SHP-1)

;----- Dropout probability -----
CHZDR = A(2)
SURDR = EXP(-CHZDR)

;----- Simulation of events -----
IF(ICALL.EQ.4) THEN ; for simulation

;;; DROPOUT EVENTS ;;;;
IF(NEWIND.NE.2) THEN ; draw random number for dropout once per subject
  CALL RANDOM(3,R) ; for dropout
  RDRP = R
ENDIF

IF(DRP.EQ.1) THEN ; check previous dropout status
  RTE = 0
  DV= 0
ELSE

IF(RDRP.GT.SURDR) THEN ; dropout not due to lack of efficacy
  DV=0
  DRP=1
  RTE = 1
  SCOUNTDL = SCOUNTDL +1 ; count event per dose level
  SCOUNT = SCOUNT +1
ENDIF
ENDIF ; end DRP=1
;;; END DROPOUT EVENTS ;;;;

;;; SEIZURE EVENTS ;;;;
IF(DRP.EQ.0) THEN ; if no dropout go on with seizure evaluation
  CALL RANDOM (2,R) ; For seizures, draw random number at every time point to
make repeated events independent
  DV=0
  RTE = 0
  ESC = 0

IF(TIME.EQ.385.AND.CDL.EQ.1) THEN
  RTE = 1 ; for censor observations after 121 weeks when DL=1
  SCOUNTDL = SCOUNTDL +1 ; count event per DL
  SCOUNT = SCOUNT +1
ENDIF

IF(TIME.EQ.588.AND.CDL.EQ.2) THEN
  RTE = 1 ; for censor observations after 121 weeks when DL=1
  SCOUNTDL = SCOUNTDL +1 ; count event per DL
  SCOUNT = SCOUNT +1
ENDIF

IF(TIME.EQ.791.AND.CDL.EQ.3) THEN
  RTE = 1 ; for censor observations after 121 weeks when DL=1
  SCOUNTDL = SCOUNTDL +1 ; count event per DL
  SCOUNT = SCOUNT +1
ENDIF

```

```

IF(R.GT.SUR) THEN ; Seizure event
  DV=1
  RTTE = 1
  SCOUNTDL = SCOUNTDL +1 ; count event per DL
  SCOUNT = SCOUNT +1
  IF(TIMEDL1.GE.21.AND.TIMEDL1.LT.203) THEN ; Period of length 182 days see
protocol p38 and SAP p61
    ESC = 1 ; escalation indicator, only escalate within the evaluation period
    EVSEIZ = 1 ; indicator for seizure during evaluation period
  ENDIF
  ENDIF ; end R > SUR
ENDIF ; end DRP=0

; Set RTTE =0 for time greater the scheduled observation period so that it is
filtered out by PSN
IF(TIME.GT.385.AND.CDL.EQ.1) THEN
  RTTE = 0 ; for censor observations after 121 weeks when DL=1
ENDIF

IF(TIME.GT.588.AND.CDL.EQ.2) THEN
  RTTE = 0 ; for censor observations after 121 weeks when DL=1
ENDIF

IF(TIME.GT.791.AND.CDL.EQ.3) THEN
  RTTE = 0 ; for censor observations after 121 weeks when DL=1
ENDIF

ENDIF ; end ICALL=4

; some time counters
TEVAL = TIMEDL1- 21 ; time since start of evaluation period
TDIF = TIME-TP ; time since last event
TDIFEVAL = TEVAL - TPEVAL ; time since last event in evaluation period

IF(DV.EQ.1) THEN
  TP=TIME ; time of event
  TPEVAL=TEVAL
ENDIF

IF(TDIFEVAL.GE.182.AND.EVSEIZ.EQ.0) M6FREE = 1 ; indicator for 6-months seizure
freedom

$THETA
(-7.22) ; lnLAMBDA1
(0.493) ; SHAPE1
(-4.72) ; lnLAMBDA
(0.713) ; SHAPE
(-1.12) ; NSP3M<1_LAM1
(1.94) ; NSP3M7-50_LAM1
(3.3) ; NSP3M>50_LAM1
(-1.37) ; NSP3M<1_LAM
(1.36) ; NSP3M7-50_LAM
(2.53) ; NSP3M>50_LAM
(-0.00917) ; SLLCM_1
(-0.00658) ; SLCBZ_1
(-0.00751) ; SLLCM
(-0.0153) ; SLCBZ
(0 FIX) ; LCM_1
(0 FIX) ; LCM
(-0.0256) ; SLAGE_1
$OMEGA 4.12; IIV_LAM

$SIMULATION (5988566) (39978 UNIFORM) (39979 UNIFORM) ONLYSIM NOPREDICTION SUB=100
$STABLE ID TYPE CDOSE CAUC TIME TIMEDL SCOUNT CDL TDIF TP DV DRP M6FREE NOPRINT
ONEHEADER FORMAT=SF12.3 FILE=simtab

```
